# Supplementary material for: Implementation of Harmonized Food Consumption Data Collection in the Balkan Region According to the EFSA EU Menu Methodology Standards
Source: Front Nutr. 2022 Jan 20;8:809328. doi: 10.3389/fnut.2021.809328 (PMC8811292; doi:10.3389/fnut.2021.809328)
Supplement: Supplementary file 1 [file Data_Sheet_1.PDF]

Back

Copy the food into new food item

FOOD ID:

0003061

FOOD NAME (English):

Yoghurt, 2.8% mf

GENERIC ORIGINAL FOOD NAME:

Jogurt, 2.8% mleczne masti

SCIENTIFIC NAME:

BRAND NAME:

FOOD NAME (RS):

Jogurt, 2.8% mleczne masti

FOOD NAME (MK):

Јогурт, 2.8% млечна маст

FOOD NAME (BiH):

Jogurt, 2.8% mleczne masti

FOOD NAME (MN):

Jogurt, 2.8% mleczne masti

ORIGIN:

A

FOOD GROUP:

MILK\_MILK\_PRODUCT OR MILK SUBSTITUTE

FOOD SUB GROUP:

MILK, MILK PRODUCT OR MILK SUBSTITUTE

ACTIVE FOOD:

Yes

CALCULATE AS SUPPLEMENT:

No

EXCLUDE FROM QUESTIONNAIRES:

No

PRESENT ON SITE:

Yes

INDUSTRIAL PRODUCT:

Yes

ALLERGENS:

SMALL PORTION

125(g/ml)

MEDIUM PORTION

250(g/ml)

LARGE PORTION

500(g/ml)

EXTRA LARGE PORTION

0(g/ml)

Upload photo

Upload photo

Upload photo

Upload photo

\*RS Admin / Serbia

EDIT DATA

NUTRITIVE VALUES

RECIPE

LANGUAL

FOODEX 2

Exposure hierarchy ▼

Foodex2 codes

Grains and grain-based products[A000J]

Vegetables and vegetable products[A00FJ]

Starchy roots or tubers and products thereof, sugar plants[A000]

Legumes, nuts, oilseeds and spices[A011X]

Fruit and fruit products[A01BS]

Meat and meat products[A01QR]

Fish, seafood, amphibians, reptiles and invertebrates[A026T]

Milk and dairy products[A02LR]

Eggs and egg products[A031E]

Sugar and similar, confectionery and water-based sweet dessert

Animal and vegetable fats and oils and primary derivatives the

BASIC CODE

A02NG

Yoghurt, cow milk, plain

FACET : [F02] Part-nature

A0BZ2

Fermented milk (as part-nature)

FACET : [F07] Fat-content

A06ZP

2.8 % fat

FACET : [F10] Qualitative-info

A077A

Full fat

FACET : [F27] Source-commodities

A04HG

Cattle milk

FACET : [F28] Process

A0CQZ

Fermentation

Search

ADD FoodEX2 CODE to FOOD

© 2011-2019 DAP. All rights reserved.
